| <b>Code</b> | <b>Quality of Evidence</b>        | <b>Definition</b>                                                                                                                                                                                                                                                                                                                                                                                                                                                                                                                            |
|-------------|-----------------------------------|----------------------------------------------------------------------------------------------------------------------------------------------------------------------------------------------------------------------------------------------------------------------------------------------------------------------------------------------------------------------------------------------------------------------------------------------------------------------------------------------------------------------------------------------|
| A           | High                              | Further research is very unlikely to change the level of confidence in the estimate of effect. i.e. <ul style="list-style-type: none"> <li>• Several high-quality studies with consistent results</li> </ul>                                                                                                                                                                                                                                                                                                                                 |
| B           | Moderate                          | Further research is likely to have an impact in current confidence in the estimate of effect and may change the estimate. i.e. <ul style="list-style-type: none"> <li>• One high quality study</li> <li>• Several studies with some limitations</li> </ul>                                                                                                                                                                                                                                                                                   |
| C           | Low                               | Further research is very likely to have an important impact on the level of confidence in the estimate of effect and would likely change the estimate. i.e. <ul style="list-style-type: none"> <li>• One or more studies with severe limitations</li> </ul>                                                                                                                                                                                                                                                                                  |
| D           | Very Low                          | Estimate of effect is very uncertain. i.e. <ul style="list-style-type: none"> <li>• No direct research evidence</li> <li>• One of more studies with very severe limitations</li> </ul>                                                                                                                                                                                                                                                                                                                                                       |
| <b>Code</b> | <b>Strength of recommendation</b> | <b>Implications when combined with evidence grade</b>                                                                                                                                                                                                                                                                                                                                                                                                                                                                                        |
| 1           | Strong                            | 1A: Strong recommendation, applies to most patients without reservation. Clinicians should follow a strong recommendation unless a clear and compelling rationale for an alternative approach is present.<br>1B: Strong recommendation, applies most patients. Clinicians should follow a strong recommendation unless a clear and compelling rationale for an alternative approach is present.<br>1C: Strong recommendation, applies to most patients. Some of the evidence base supporting the recommendation is, however, of low quality. |
| 2           | Weak                              | 2A: Weak recommendation and best action may differ depending on circumstances or patients or societal values.<br>2B: Weak recommendation and alternative approaches likely to be better for some patients under some circumstances.<br>2C: Very weak recommendation; other alternatives may be equally reasonable.                                                                                                                                                                                                                           |

**Supplementary Table:** Grading of Recommendations Assessment, Development and Evaluation (GRADE) approach: a common, systematic and transparent approach to grading quality of evidence and strength of recommendations. The GRADE approach rates evidence across studies for specific clinical outcomes to link evidence-quality evaluations to recommendations in clinical guidelines. The GRADE codes according to the levels of evidence are shown.

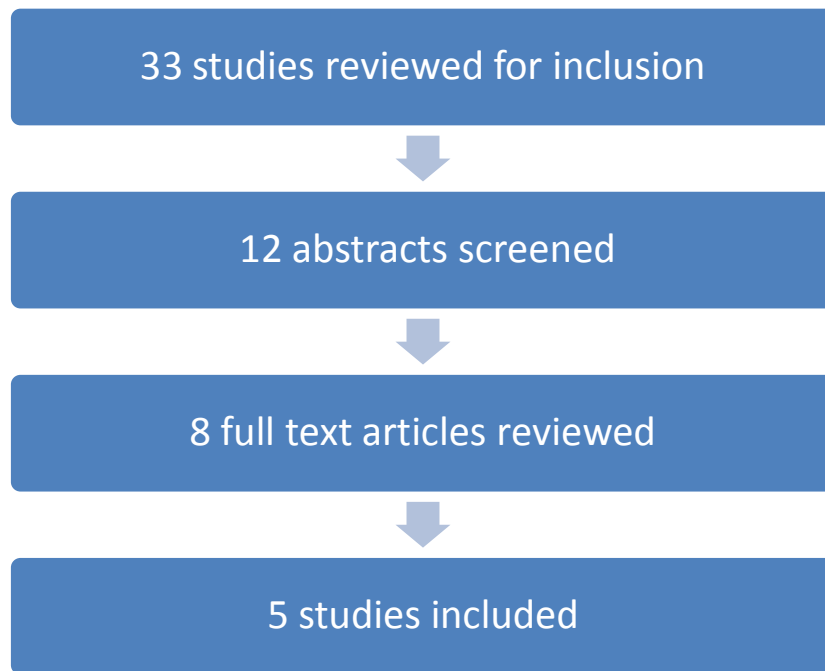

**Supplementary Figure 2:** Outline of systematic literature search according to PRISMA methodology for susceptibility of Group A streptococcus to trimethoprim-sulfamethoxazole.
